# Supplementary material for: Recurrent models of orientation selectivity enable robust early-vision processing in mixed-signal neuromorphic hardware
Source: PubMed Central journal article supplement — Nat Commun. 2025 Jan 2;16:243. doi: 10.1038/s41467-024-55749-y (PMC11696034; doi:10.1038/s41467-024-55749-y), 2025-01-02
Supplement: 41467_2024_55749_MOESM1_ESM.pdf [file 41467_2024_55749_MOESM1_ESM.pdf]

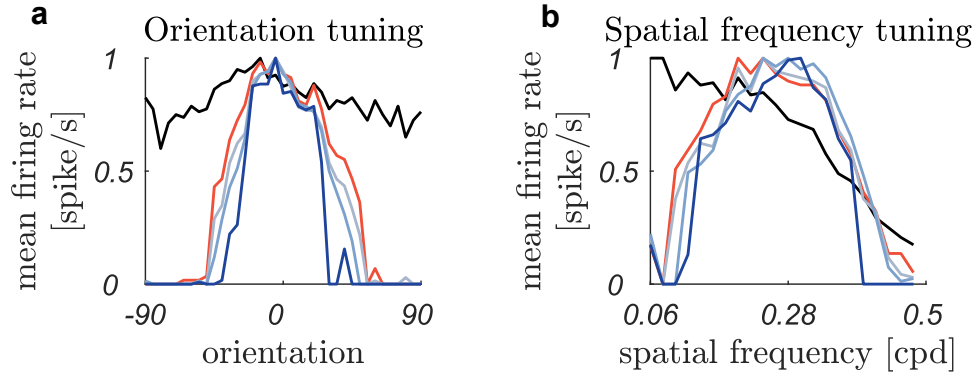

Figure S1: **Tuning curves obtained by adding recursive excitation.** Comparison between the tuning curves for the central neuron of the simulated V1 layer when only recurrent inhibition is present (red curves, parameters set to  $d = 5$ ,  $\sigma_k = 1.2$ , and  $b = 3 \cdot 10^3$ ) and when recurrent excitation is also added (blue curves, parameters set to  $d = 5$ ,  $\sigma_k = 1.2$ ,  $b = 3 \cdot 10^3$ , and  $b^E \in \{50, 100, 200\}$ , increasing  $b^E$  values represented by increasing color saturation). **a** Orientation tuning curves. **b** Spatial frequency tuning curves. Black lines represent the curves obtained when both recurrent inhibition and excitation are removed.

28 grating is described in a polar coordinate system in terms of its orientation  $\theta$  and radial spatial frequency  
 29  $k_s$ , with units of degrees and cycles/deg (cpd), respectively. The unit of measure cpd is commonly used  
 30 when describing visual stimuli in psychophysics experiments and indicates the number of cycles per  
 31 degree of visual field (in this case, a cycle is a spatial period of the sinusoid). As such, it is dependent  
 32 on the distance of the observer from the visual stimuli, or, in this case, the recording device. PsychoPy  
 33 automatically adjusts the size of the gratings reproduced on the screen based on the distance from the  
 34 recording device and the monitor's resolution in pixels, to match the desired spatial frequency value.  
 35 Since only moving stimuli generate a response from the DVS, drifting gratings were used instead of  
 36 static ones. Each grating is thus also described by its temporal frequency, i.e., the number of grating  
 37 cycles that pass a point in the image plane per unit time. Constant temporal frequency results in the  
 38 phase of the sinusoidal grating evolving linearly with time. Supplementary Fig. S2a shows an example  
 39 of consecutive snapshots of a moving sinusoidal grating as reproduced on screen.

40 The visual stimuli were displayed on a screen with maximum brightness and acquired by the DVS event  
 41 camera (at a fixed distance of 40 cm) in a semi-dark room to reduce as much as possible the refraction  
 42 of the screen. Supplementary Fig. S2b shows examples of the DVS response to the moving sinusoidal  
 43 gratings as visualized through the jAER interface. Each pixel of the DVS is represented as a square  
 44 that appears grey if the pixel is silent and becomes white or black if ON and OFF events, respectively,  
 45 are generated. This figure illustrates in practice the DVS response to local contrast changes, explained  
 46 theoretically in Supplementary Fig. S3.

47

48 It is worth noting that, due to the nature of the DVS, fast-moving stimuli elicit a higher number of  
 49 events than slow ones. As such, for moving gratings with the same spatial frequency, the higher the radial  
 50 spatial frequency  $k_s$  the lower the velocity of the grating, resulting in a variable average number of events  
 51 recorded. Considering a constant drifting velocity instead of constant spatial frequency does not produce  
 52 a constant average number of recorded events either, because a higher number of contrast differences for  
 53 unit of space (i.e., higher stimulus spatial frequency  $k_s$ ) elicit more events. This phenomenon is shown  
 54 in Supplementary Fig. S4.

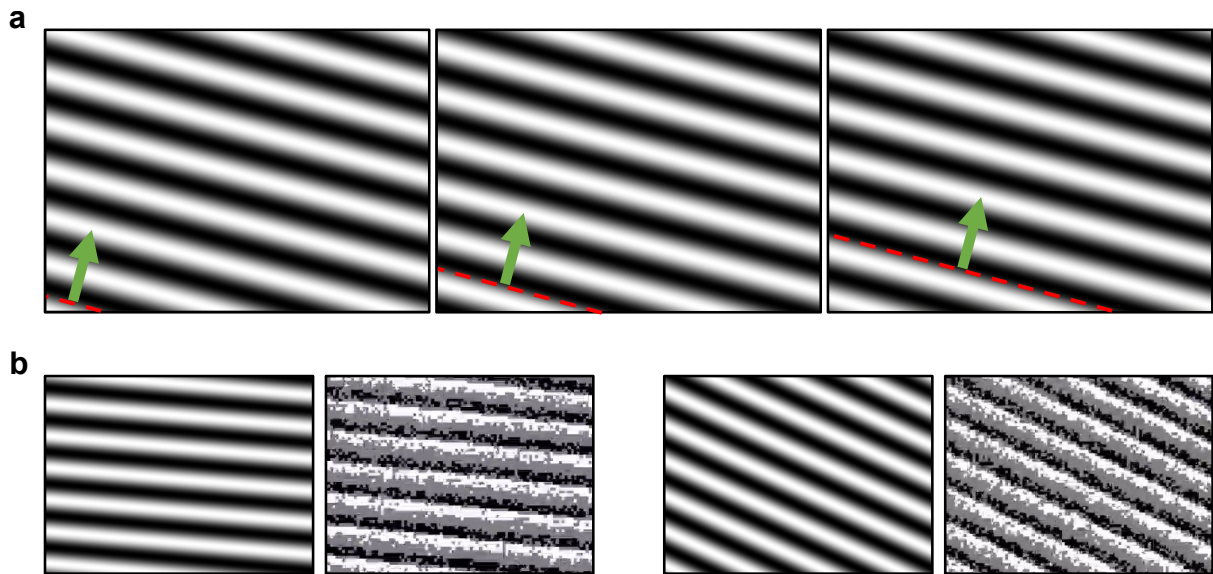

Figure S2: **Moving sinusoidal gratings.** **a** Consecutive snapshots of a moving sinusoidal grating with a temporal frequency of 3 Hz captured at intervals of 0.2 s. The red dashed line highlights the same wavefront in all snapshots, whereas the green arrow indicates the direction of movement, perpendicular to the wavefront. **b** Pairs of snapshots of moving sinusoidal gratings as reproduced on the screen and of the corresponding DVS recordings as visualized through the jAER interface.

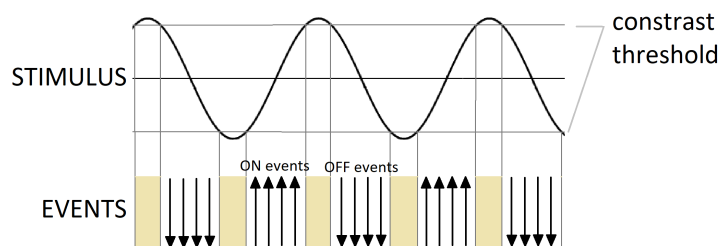

Figure S3: **How the sinusoidal grating is converted in events by the DVS.** Upward arrows represent ON events, whereas downward arrows represent OFF events. Yellow regions denote temporal intervals with no events.

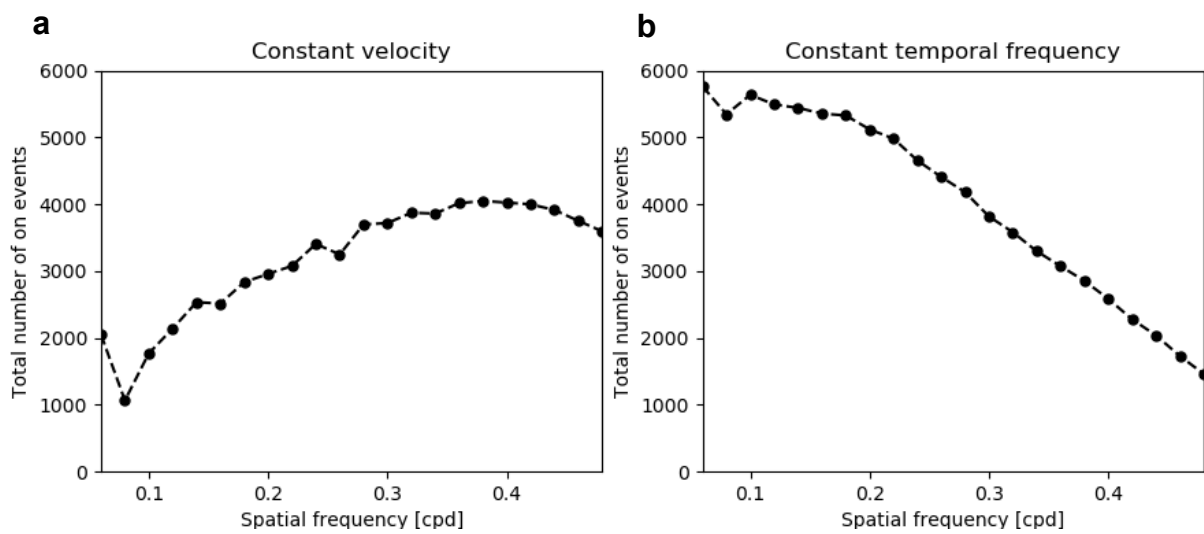

Figure S4: **Variation of the total number of events as a function of spatial frequency.** The total number of events registered by the DVS in recording slots of 1 s each varies according to the spatial frequency  $k_s$  of the visual stimulus. Panel **a** displays the case of constant velocity (10 Hz/cpd), whereas panel **b** displays the case of constant temporal frequency (3 Hz). The total number of events is obtained considering ON events in a central patch of  $19 \times 19$  pixels.
